# Supplementary material for: Propofol postconditioning alleviates diabetic myocardial ischemia-reperfusion injury via the miR-200c-3p/AdipoR2/STAT3 signaling pathway
Source: PubMed Central journal article supplement — Mol Med Rep. 2022 Feb 22;25(4):137. doi: 10.3892/mmr.2022.12653 (PMC8908333; doi:10.3892/mmr.2022.12653), 2022-02-22

Figure S1. Transfection efficiencies of miR-200c-3p mimics and si-AdipoR2. (A) Transfection efficiency of miR-200c-3p mimic was detected using RT-qPCR. (B) Transfection efficiency of si-AdipoR2 was detected using RT-qPCR. Three independent cell tests were performed. Data are presented as the mean  $\pm$  standard deviation. One-way ANOVA was used for comparisons between groups followed by Tukey's post hoc test. \*\*\* $P < 0.001$ . miR, microRNA; RT-qPCR, reverse transcription-quantitative PCR; si, small interfering RNA; AdipoR2, adiponectin receptor 2; H/R, hypoxia/reperfusion; NC, negative control.

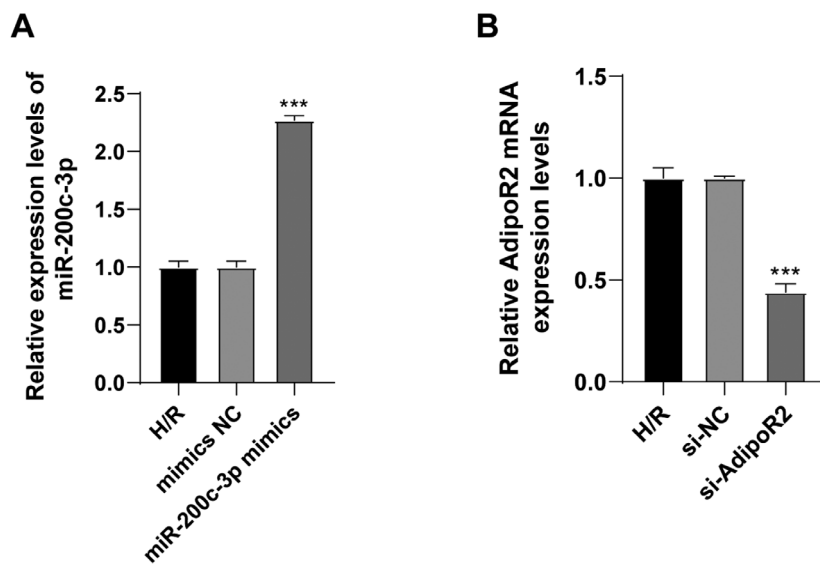

Figure S2. Molecular mechanism of propofol postconditioning on protecting against MI/RI in the diabetic myocardium. Propofol postconditioning promoted the expression of AdipoR2 by inhibiting the binding of miR-200c-3p to AdipoR2, activating the STAT3 pathway and inhibiting cardiomyocyte apoptosis, thus protecting the MI/RI rat model. AdipoR2, adiponectin receptor 2; miR, microRNA; MI/RI, myocardial ischemic reperfusion injury; UTR, untranslated region.

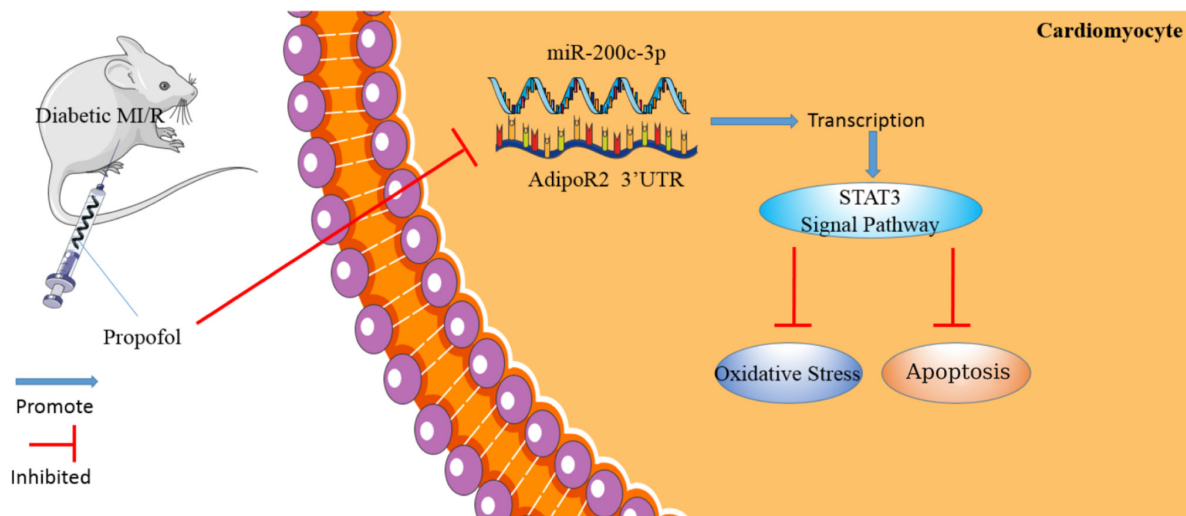

Supplement: Supplementary_Data.pdf [file Supplementary_Data.pdf]
